# Supplementary material for: Native joint infections in Iceland 2003–2017: an increase in postarthroscopic infections
Source: HighWire-hosted journal article supplement (doi:10.1136/annrheumdis-2021-220820), 2021-09-17
Supplement: annrheumdis-2021-220820supp003_data_supplement.pdf [file annrheumdis-2021-220820supp003_data_supplement.pdf]

Table 1. Predisposing conditions for NJI in adults (other than recent joint procedures). *P*-value, males cf females.

| Condition <sup>a</sup>                 | Adults (≥18 years)<br>N=259 | Male<br>N=174 | Female<br>N=85 | <i>P</i> -value |
|----------------------------------------|-----------------------------|---------------|----------------|-----------------|
| Osteoarthritis                         | 69 (27)                     | 39 (22)       | 30 (35)        | <b>0.03</b>     |
| Ischemic heart disease                 | 35 (13.5)                   | 25 (14)       | 10 (12)        | 0.7             |
| Immunosuppressive therapy <sup>b</sup> | 32 (12)                     | 15 (8.5)      | 17 (20)        | <b>0.01</b>     |
| Diabetes mellitus type 2               | 30 (12)                     | 21 (12)       | 9 (10.5)       | 0.8             |
| Blunt trauma to joint                  | 27 (10)                     | 22 (12.5)     | 5 (6)          | 0.1             |
| Chronic renal failure                  | 25 (10)                     | 18 (10)       | 7 (8)          | 0.7             |
| Crystal arthropathy <sup>c</sup>       | 20 (8)                      | 15 (8.5)      | 5 (6)          | 0.6             |
| Heart failure                          | 18 (7)                      | 15 (8.5)      | 3 (3.5)        | 0.2             |
| Psoriasis                              | 16 (6)                      | 12 (7)        | 4 (5)          | 0.6             |
| Rheumatoid arthritis                   | 16 (6)                      | 6 (3)         | 10 (12)        | <b>0.01</b>     |
| Alcohol abuse                          | 12 (5)                      | 8 (4.5)       | 4 (5)          | 1               |
| Chronic liver disease <sup>d</sup>     | 11 (4)                      | 6 (3)         | 5 (6)          | 0.3             |
| Malignancy <sup>e</sup>                | 11 (4)                      | 7 (4)         | 4 (5)          | 0.8             |
| Injection drug use                     | 9 (3.5)                     | 4 (2)         | 5 (6)          | 0.2             |
| Psoriatic arthritis                    | 7 (3)                       | 2 (1)         | 5 (6)          | <b>0.04</b>     |
| Polymyalgia rheumatica                 | 4 (1.5)                     | 1 (0.5)       | 3 (3.5)        | 0.1             |
| HIV                                    | 1 (0.4)                     | 0             | 1 (1)          | 0.3             |

Data are no/No (%). *P*-value compares males and females, bolded where statistically significant.

<sup>a</sup>Total number of cases with predisposing conditions: 212 adults, some patients had >1 condition.

<sup>b</sup>Some patients were taking >1 immunosuppressive drug; Methotrexate 15, glucocorticoids 25, Sulfasalazine 1, Hydroxychloroquine 1, Mycophenolic acid 1, Etanercept 1, Infliximab 3, other chemotherapeutic agents for cancer: 3.

<sup>c</sup>Gout 17 cases, calcium pyrophosphate disease 3 cases.

<sup>d</sup> Nine patients had hepatitis C, two patients had both hepatitis C and B, three patients had cirrhosis.

<sup>e</sup> Solid tumors 6 cases, hematologic malignancy 5 cases.

Table 2. Empiric and definitive antimicrobial therapy for septic arthritis in Iceland 2003-2017

| Antibiotic <sup>a</sup>   | Children (<18 years) |                    | Adults (≥18 years) |                    |
|---------------------------|----------------------|--------------------|--------------------|--------------------|
|                           | Empiric therapy      | Definitive therapy | Empiric therapy    | Definitive therapy |
| <b>Cloxacillin</b>        | 33/40 (82.5)         | 24/40 (60)         | 166/256 (65)       | 127/250 (51)       |
| <b>Cefuroxime</b>         | 4/40 (10)            | 5/40 (12.5)        | 0                  | 0                  |
| <b>Cefazolin</b>          | 1/40 (2.5)           | 2/40 (5)           | 24/256 (9)         | 22/250 (9)         |
| <b>Vancomycin</b>         | 0                    | 0                  | 18/256 (7)         | 25/250 (10)        |
| <b>Penicillin</b>         | 1/40 (2.5)           | 2/40 (5)           | 16/256 (6)         | 29/250 (12)        |
| <b>Ceftriaxone</b>        | 0                    | 3/40 (7.5)         | 14/256 (6)         | 29/250 (12)        |
| <b>Clindamycin</b>        | 0                    | 2/40 (5)           | 11/256 (4)         | 9/250 (4)          |
| <b>Ampicillin</b>         | 1/40 (2.5)           | 0                  | 4/256 (2)          | 6/250 (2)          |
| <b>Other <sup>b</sup></b> | 0                    | 2/40 (5)           | 3/256 (1)          | 10/250 (4)         |
| <b>Total <sup>c</sup></b> | 40                   | 40                 | 256                | 257                |

Data are no/No (%).

<sup>a</sup> Information on empiric therapy and definitive therapy was available in all children and 99% (256/259) and 96,5% (250/259) of adult cases respectively.

<sup>b</sup> Definitive therapy: Amoxicillin-clavulanate 1, ceftazidime 2, ciprofloxacin 6, imipenem 1, linezolid 2, rifampicin 1 case (used with ceftriaxone).

<sup>c</sup> In seven adult cases 2 antibiotics met criteria for definitive treatment.

Table 3. Treatment and outcome for septic arthritis in Iceland 2003-2017. *P*-value, children cf adults.

| Treatment                                          | Children (<18 years) | Adults (≥18 years) | <i>P</i> -value    |
|----------------------------------------------------|----------------------|--------------------|--------------------|
| Duration of parenteral therapy (days) <sup>a</sup> | 13.5                 | 29                 | <b>p&lt;0.0001</b> |
| <b>Surgical management:</b>                        |                      |                    |                    |
| Closed needle aspiration                           | 6/40 (15)            | 205/259 (79)       | <b>p&lt;0.0001</b> |
| Open or arthroscopic surgery                       | 15/40 (37.5)         | 107/259 (41)       | p=0.7              |
| <b>Outcomes:</b>                                   |                      |                    |                    |
| Relapse                                            | 0                    | 12/259 (4.6)       | -                  |
| Amputation <sup>b</sup>                            | 0                    | 2/259 (0.8)        | -                  |
| DROM <sup>c</sup>                                  | 9/36 (25)            | 133/175 (76)       | <b>p&lt;0.0001</b> |
| Insertion of prosthetic joint <sup>d</sup>         | 0                    | 24/259 (9)         | -                  |
| 30-day mortality                                   | 0                    | 14/259 (5.4)       | -                  |

Data are no/No (%). *P*-value compares children and adults, bolded where statistically significant. Median values are shown for duration of parenteral treatment.

<sup>a</sup> Information concerning the length of intravenous treatment was noted in 81% (241/299) of all cases. Adults: IQR=21–42 days, children: IQR=10–28,5 days

<sup>b</sup> One patient had a history of diabetes with chronic leg ulcers and the other a history of peripheral vascular disease with an infected femoropopliteal bypass.

<sup>c</sup> DROM: decreased range of motion at discharge or first follow up appointment. Information was found in 67.5% of adult cases (175/259) and 90% of children (36/40).

<sup>d</sup> Average time from diagnoses to insertion of prosthetic joint was 3,5 years, median time 2,5 years. All were placed within 9 years of infection.

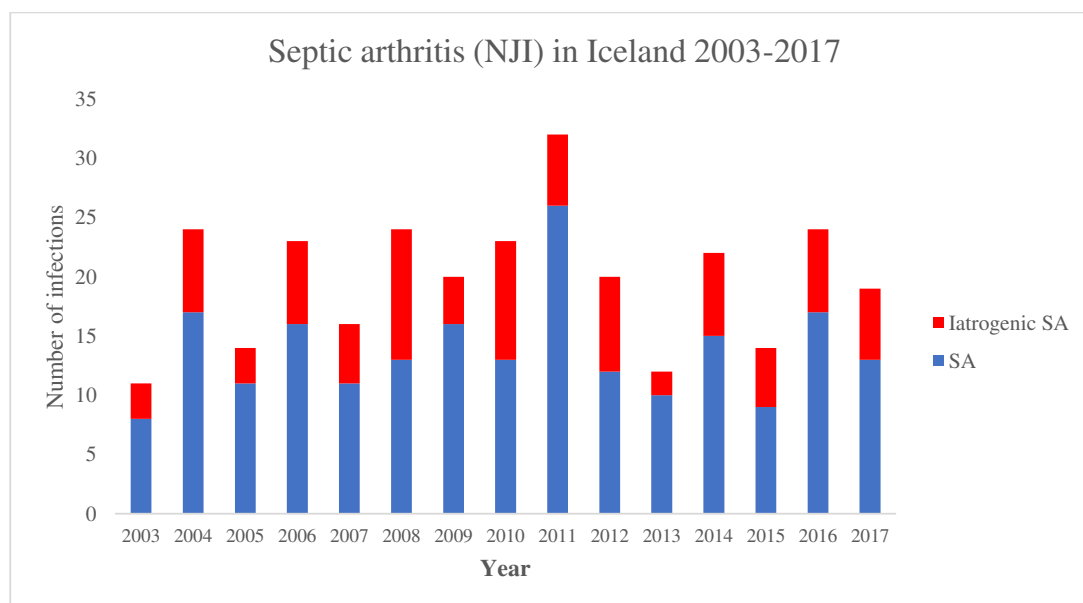

Figure 1: Iatrogenic infections as part of the total number of joint infections per year. SA: septic arthritis.

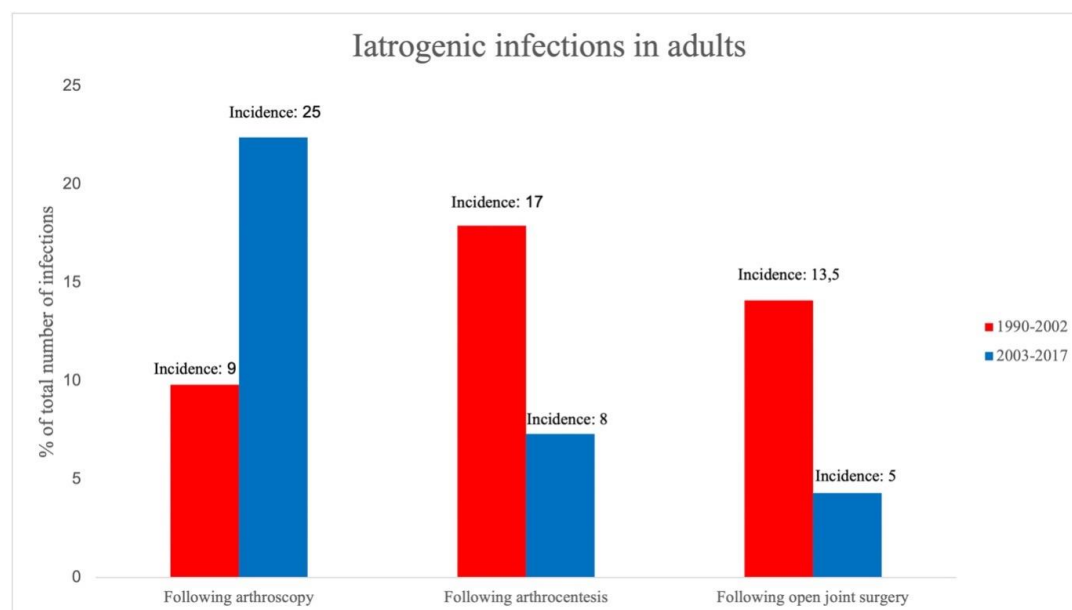

Figure 2: Comparison of iatrogenic infections in Iceland, 1990-2002 and 2003-2017. Incidence numbers are shown above each column as per 100.000 residents per year.
