# Supplementary figures and images for: Native joint infections in Iceland 2003–2017: an increase in postarthroscopic infections
Source: HighWire-hosted journal article supplement (doi:10.1136/annrheumdis-2021-220820), 2021-09-17

## Supplementary figure 2.jpg

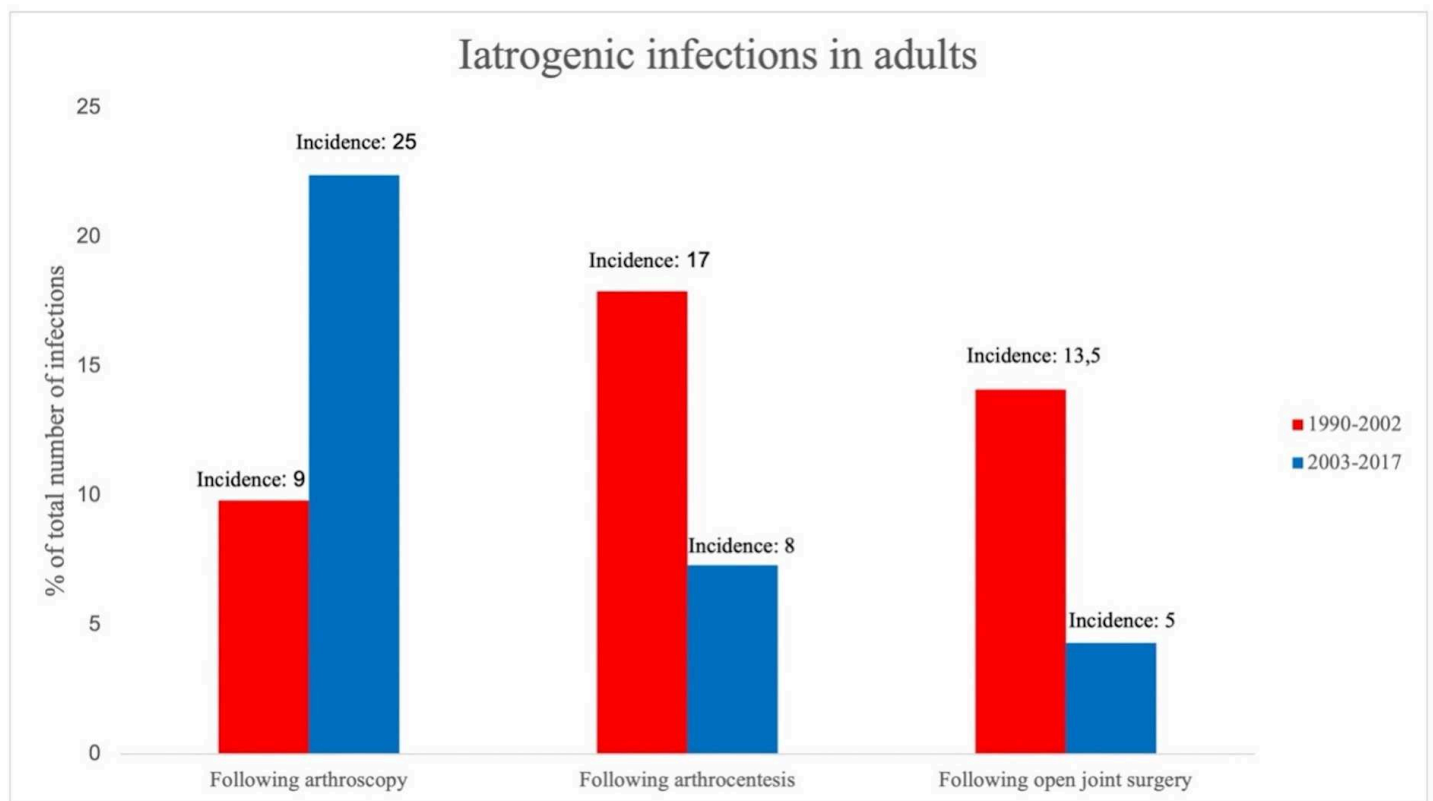

Supplement: annrheumdis-2021-220820supp002_data_supplement.pdf [file annrheumdis-2021-220820supp002_data_supplement.pdf]
